# Supplementary material for: Digital quantitative tissue image analysis of hypoxia in resected pancreatic ductal adenocarcinomas
Source: PubMed Central journal article supplement (PMC9376475; doi:10.3389/fonc.2022.926497), 2022-08-01
Supplement: Image_1.pdf [file Image_1.pdf]

### HP-WholeTumour

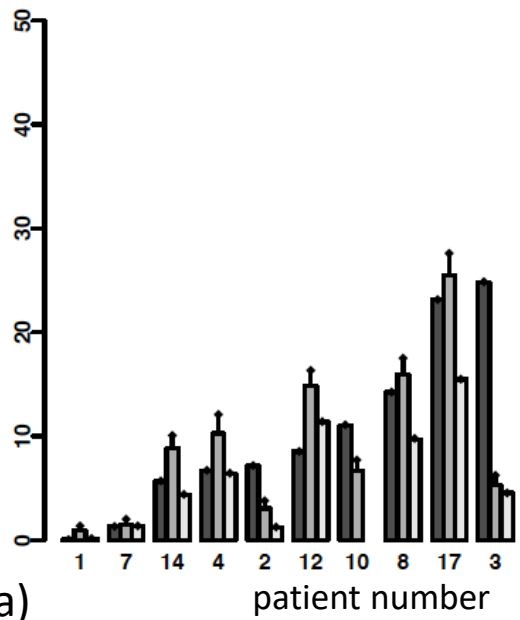

### HP-Epithelial

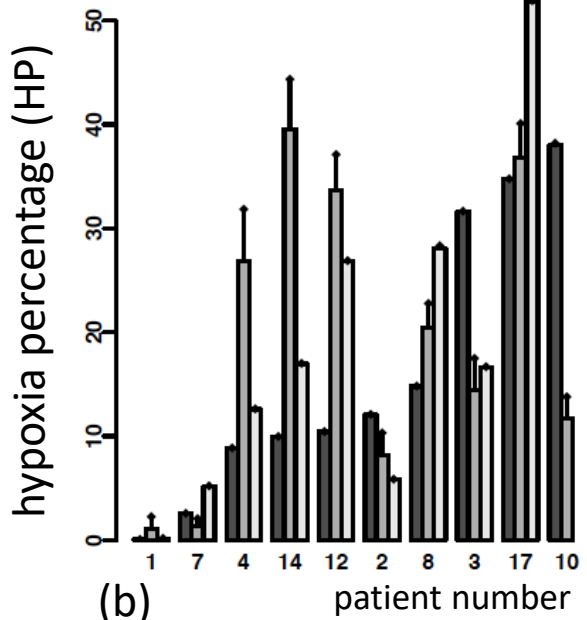

### HP-Stromal

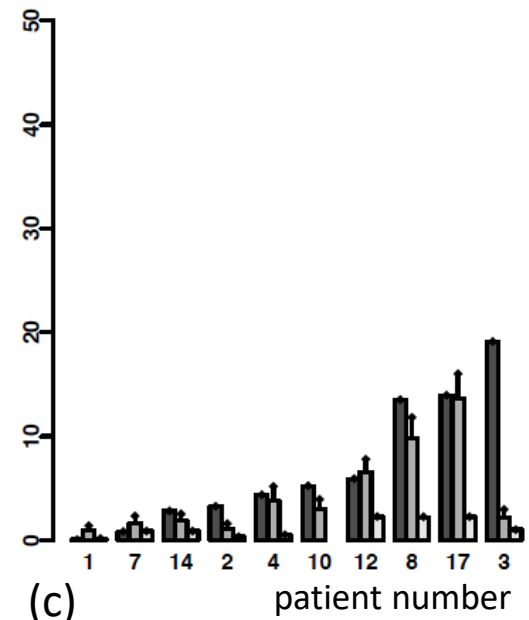

|              | HP: Developer | HP: Genie | HP: Tissue Studio |
|--------------|---------------|-----------|-------------------|
| Whole Tumour | 0 to 25 %     | 0 to 25 % | 0 to 15 %         |
| Epithelial   | 0 to 38 %     | 0 to 40 % | 0 to 52 %         |
| Stromal      | 0 to 19 %     | 0 to 14 % | 0 to 2 %          |

- (Definiens) Developer
- (Aperio) Genie
- (Definiens) Tissue Studio
